# Supplementary material
Source: MDPI journal article supplement (https://www.mdpi.com/2410-3888/7/3/136)
Supplement: s1 [file s1]

**Table S1.** Status of Elasmobranchii in the Mediterranean according to classification of Dulvy et al. [17] and percentage of positive hauls of each species caught in each stratum (shelf, 10–200 m; slope, 200–800 m; overall, 10–800 m) during MEDITS survey in Strait of Sicily.

| TAXA                          | MRRL | % Positive Hauls |       |         |
|-------------------------------|------|------------------|-------|---------|
|                               |      | Shelf            | Slope | Overall |
| BATOIDS                       |      |                  |       |         |
| <i>Aetomylaeus bovinus</i>    | //   | 0.5              | 0.0   | 0.2     |
| <i>Dasyatis pastynaca</i>     | VU   | 3.1              | 0.1   | 1.4     |
| <i>Dipturus batis</i>         | //   | 0.1              | 0.0   | 0.0     |
| <i>Dipturus oxyrinchus</i>    | NT   | 0.1              | 20.2  | 11.1    |
| <i>Leucoraja circularis</i>   | CR   | 0.1              | 1.3   | 0.7     |
| <i>Leucoraja fullonica</i>    | CR   | 0.0              | 0.1   | 0.0     |
| <i>Leucoraja melitensis</i>   | CR   | 4.1              | 9.9   | 7.3     |
| <i>Leucoraja naevus</i>       | NT   | 0.0              | 0.2   | 0.1     |
| <i>Myliobatis aquila</i>      | VU   | 2.5              | 0.0   | 1.1     |
| <i>Raja asterias</i>          | NT   | 8.8              | 0.5   | 4.2     |
| <i>Raja brachyura</i>         | NT   | 1.2              | 0.0   | 0.5     |
| <i>Raja clavata</i>           | NT   | 26.2             | 19.8  | 22.7    |
| <i>Raja miraletus</i>         | LC   | 29.1             | 13.3  | 19.5    |
| <i>Raja montagui</i>          | LC   | 10.2             | 1.9   | 5.7     |
| <i>Raja polystigma</i>        | LC   | 1.0              | 0.3   | 0.6     |
| <i>Raja radula</i>            | EN   | 1.0              | 0.3   | 0.6     |
| <i>Rostroraja alba</i>        | EN   | 0.4              | 0.1   | 0.2     |
| <i>Tetronarce nobiliana</i>   | //   | 0.6              | 2.6   | 1.7     |
| <i>Torpedo marmorata</i>      | LC   | 11.6             | 5.9   | 8.5     |
| <i>Torpedo torpedo</i>        | LC   | 1.5              | 0.2   | 0.8     |
| SHARKS                        |      |                  |       |         |
| <i>Centrophorus uyato</i>     | //   | 0.0              | 0.6   | 0.3     |
| <i>Dalatias licha</i>         | VU   | 0.0              | 11.4  | 6.2     |
| <i>Etmopterus spinax</i>      | LC   | 0.0              | 52.7  | 28.9    |
| <i>Galeorhinus galeus</i>     | VU   | 0.0              | 0.2   | 0.1     |
| <i>Galeus melastomus</i>      | LC   | 0.2              | 78.8  | 43.2    |
| <i>Heptranchias perlo</i>     | DD   | 0.1              | 3.9   | 2.2     |
| <i>Hexanchus griseus</i>      | LC   | 0.0              | 0.8   | 0.4     |
| <i>Mustelus asterias</i>      | VU   | 0.9              | 0.0   | 0.4     |
| <i>Mustelus mustelus</i>      | VU   | 18.7             | 0.8   | 8.9     |
| <i>Mustelus punctulatus</i>   | VU   | 3.5              | 0.0   | 1.6     |
| <i>Oxynotus centrina</i>      | CR   | 0.9              | 0.9   | 0.9     |
| <i>Scyliorhinus canicula</i>  | //   | 37.5             | 28.0  | 32.4    |
| <i>Scyliorhinus stellaris</i> | NT   | 1.1              | 0.2   | 0.6     |
| <i>Squalus acanthias</i>      | EN   | 0.0              | 0.2   | 0.1     |
| <i>Squalus blainville</i>     | DD   | 21.5             | 14.5  | 17.7    |

MRRL, Mediterranean Regional Red List; CR, Critically Endangered; EN, Endangered; VU, Vulnerable; NT, Near Threatened; LC, Least Concern; DD, Data Deficient; NI, not included in the MRRL; //, not available.

**Table S2.** Outputs of the sensitivity analysis. R.est, estimated resilience; K.est, estimated carrying capacity; CI, 95% confidence interval.

| Scenarios            | r prior (CI) | B/K prior (CI) | r.est | K.est  | K.est (CI) | B/B <sub>MSY</sub> | B/B <sub>MSY</sub> (CI) | F/F <sub>MSY</sub> | F/F <sub>MSY</sub> (CI) |
|----------------------|--------------|----------------|-------|--------|------------|--------------------|-------------------------|--------------------|-------------------------|
| Batoids(10-200m)     |              |                |       |        |            |                    |                         |                    |                         |
| Best model           | 0.015-0.8    | 0.01-0.4       | 0.70  | 14.90  | 12.0-20.5  | 1.43               | 0.79-2.61               | 0.50               | 0.05-1.16               |
| 1                    | 0.015-0.5    | 0.01-0.4       | 0.55  | 14.3   | 11.5-19.5  | 1.53               | 0.85-2.79               | 0.49               | 0.04-1.32               |
| 2                    | 0.015-0.5    | 0.2-0.6        | 0.53  | 12.5   | 11.0-14.6  | 1.74               | 0.96-3.13               | 0.32               | 0.02-0.86               |
| 3                    | 0.015-0.8    | 0.2-0.6        | 0.67  | 13.0   | 11.4-15    | 1.66               | 0.92-2.97               | 0.32               | 0.02-0.83               |
| 4                    | 0.015-0.8    | 0.01-0.6       | 0.68  | 13.5   | 11.6-15.8  | 1.59               | 0.89-2.86               | 0.36               | 0.03-0.96               |
| Batoids (200-800m)   |              |                |       |        |            |                    |                         |                    |                         |
| Best model           | 0.015-0.8    | 0.2-0.6        | 0.55  | 6.70   | 5.7-7.9    | 0.77               | 0.43-1.38               | 1.48               | 0.44-2.93               |
| 1                    | 0.015-0.5    | 0.01-0.4       | 0.44  | 9.5    | 6.5-13.9   | 0.58               | 0.33-1.04               | 1.78               | 0.41-3.8                |
| 2                    | 0.015-0.5    | 0.2-0.6        | 0.48  | 6.4    | 5.3-7.5    | 0.86               | 0.48-1.55               | 1.40               | 0.34-2.84               |
| 3                    | 0.015-0.8    | 0.01-0.4       | 0.46  | 10.1   | 7.1-14.3   | 0.51               | 0.28-0.92               | 1.99               | 0.54-4.21               |
| 4                    | 0.015-0.8    | 0.01-0.6       | 0.51  | 7.4    | 5.3-10.2   | 0.69               | 0.38-1.24               | 1.66               | 0.43-3.44               |
| Batoids (10-800m)    |              |                |       |        |            |                    |                         |                    |                         |
| Best model           | 0.015-0.8    | 0.2-0.6        | 0.63  | 105.10 | 92.8-120.8 | 1.35               | 0.75-2.48               | 0.61               | 0.10-1.25               |
| 1                    | 0.015-0.5    | 0.01-0.4       | 0.50  | 130.0  | 96.4-191.5 | 1.13               | 0.63-2.01               | 0.92               | 0.13-2.13               |
| 2                    | 0.015-0.5    | 0.2-0.6        | 0.53  | 101.8  | 89.9-119.3 | 1.44               | 0.79-2.63               | 0.58               | 0.07-1.29               |
| 3                    | 0.015-0.8    | 0.01-0.4       | 0.56  | 133.2  | 99.2-195.5 | 1.06               | 0.59-1.92               | 0.98               | 0.18-2.21               |
| 4                    | 0.015-0.8    | 0.01-0.6       | 0.60  | 120.1  | 96.2-173.3 | 1.18               | 0.65-2.14               | 0.80               | 0.11-1.83               |
| <i>R. clavata</i>    |              |                |       |        |            |                    |                         |                    |                         |
| Best model           | 0.05-0.8     | 0.01-0.6       | 0.74  | 64.1   | 56.6-74.5  | 1.50               | 0.82-2.72               | 0.38               | 0.05-0.84               |
| 1                    | 0.05-0.5     | 0.01-0.4       | 0.52  | 61.2   | 54.0-71.2  | 1.64               | 0.91-3.01               | 0.40               | 0.03-1.01               |
| 2                    | 0.05-0.5     | 0.2-0.6        | 0.58  | 58.8   | 52.5-64.7  | 1.84               | 1.02-3.15               | 0.36               | 0.04-0.75               |
| 3                    | 0.05-0.8     | 0.2-0.6        | 0.94  | 59.9   | 55.1-68.1  | 1.60               | 0.98-3.15               | 0.22               | 0.05-0.47               |
| 4                    | 0.05-0.8     | 0.01-0.4       | 0.75  | 64.1   | 56.4-74.1  | 1.50               | 0.82-2.69               | 0.38               | 0.05-0.84               |
| <i>R. miraletus</i>  |              |                |       |        |            |                    |                         |                    |                         |
| Best model           | 0.05-0.8     | 0.2-0.6        | 0.56  | 45.9   | 36.9-58.2  | 0.21               | 0.12-0.39               | 3.64               | 1.72-6.65               |
| 1                    | 0.05-0.5     | 0.01-0.4       | 0.38  | 58.0   | 42.8-85.7  | 0.20               | 0.11-0.37               | 3.98               | 1.63-7.46               |
| 2                    | 0.05-0.5     | 0.2-0.6        | 0.44  | 44.7   | 35.2-61.4  | 0.26               | 0.14-0.47               | 3.63               | 1.60-6.46               |
| 3                    | 0.05-0.8     | 0.01-0.4       | 0.54  | 58.8   | 41.0-86    | 0.17               | 0.09-0.3                | 3.95               | 1.74-7.41               |
| 4                    | 0.05-0.8     | 0.01-0.6       | 0.54  | 53.9   | 37.9-81.6  | 0.18               | 0.10-0.33               | 3.74               | 1.67-7.35               |
| Sharks (10-200m)     |              |                |       |        |            |                    |                         |                    |                         |
| Best model           | 0.015-0.8    | 0.01-0.4       | 0.83  | 26.4   | 22.5-32.6  | 1.34               | 0.75-2.41               | 0.66               | 0.10-1.74               |
| 1                    | 0.015-0.5    | 0.01-0.4       | 0.60  | 27.2   | 21.9-38.7  | 1.26               | 0.71-2.34               | 0.80               | 0.12-1.85               |
| 2                    | 0.015-0.5    | 0.2-0.6        | 0.62  | 23.7   | 21.0-27.5  | 1.43               | 0.80-2.57               | 0.60               | 0.07-1.28               |
| 3                    | 0.015-0.8    | 0.2-0.6        | 0.75  | 25.0   | 22.1-28.7  | 1.43               | 0.79-2.57               | 0.61               | 0.08-1.46               |
| 4                    | 0.015-0.8    | 0.01-0.6       | 0.82  | 25.0   | 22.0-29.2  | 1.43               | 0.80-2.58               | 0.59               | 0.09-1.29               |
| Sharks (200-800m)    |              |                |       |        |            |                    |                         |                    |                         |
| Best model           | 0.015-0.8    | 0.01-0.6       | 0.59  | 58.3   | 46.5-73.4  | 0.65               | 0.36-1.17               | 1.70               | 0.55-3.3                |
| 1                    | 0.015-0.5    | 0.01-0.4       | 0.50  | 60.9   | 46.1-92.6  | 0.68               | 0.37-1.21               | 1.72               | 0.49-3.49               |
| 2                    | 0.015-0.5    | 0.2-0.6        | 0.53  | 49.2   | 43.2-57.3  | 0.85               | 0.47-1.51               | 1.42               | 0.37-2.8                |
| 3                    | 0.015-0.8    | 0.2-0.6        | 0.61  | 52.4   | 45.9-61.4  | 0.72               | 0.39-1.31               | 1.54               | 0.48-2.95               |
| 4                    | 0.015-0.8    | 0.01-0.4       | 0.57  | 64.6   | 47.8-95.4  | 0.58               | 0.32-1.06               | 1.82               | 0.59-3.48               |
| <i>E. spinax</i>     |              |                |       |        |            |                    |                         |                    |                         |
| Best model           | 0.015-0.8    | 0.01-0.6       | 0.46  | 5.89   | 3.9-8.6    | 0.49               | 0.27-0.89               | 1.95               | 0.45-4.18               |
| 1                    | 0.015-0.1    | 0.01-0.4       | 0.18  | 6.7    | 5.0-8.79   | 0.40               | 0.21-0.72               | 2.43               | 0.32-4.93               |
| 2                    | 0.015-0.1    | 0.2-0.6        | 0.26  | 4.7    | 3.7-6.3    | 0.56               | 0.33-0.98               | 2.09               | 0.34-5.28               |
| 3                    | 0.015-0.5    | 0.2-0.6        | 0.43  | 4.8    | 3.7-6.3    | 0.63               | 0.36-1.16               | 1.80               | 0.37-3.85               |
| 4                    | 0.015-0.5    | 0.01-0.4       | 0.38  | 7.3    | 5.0-10.9   | 0.42               | 0.23-0.75               | 1.99               | 0.32-4.53               |
| <i>G. melastomus</i> |              |                |       |        |            |                    |                         |                    |                         |

|                             |           |          |      |       |            |      |           |      |           |
|-----------------------------|-----------|----------|------|-------|------------|------|-----------|------|-----------|
| Best model                  | 0.05-0.5  | 0.01-0.4 | 0.45 | 40.23 | 31.9-54.2  | 0.53 | 0.29-0.94 | 2.19 | 0.73-4.03 |
| 1                           | 0.05-0.5  | 0.2-0.6  | 0.48 | 35.8  | 31.1-41.6  | 0.59 | 0.33-1.09 | 2.03 | 0.68-3.85 |
| 2                           | 0.05-0.8  | 0.2-0.6  | 0.62 | 38.2  | 32.9-44.8  | 0.53 | 0.29-0.95 | 2.14 | 0.83-4.21 |
| 3                           | 0.05-0.8  | 0.01-0.4 | 0.59 | 42.7  | 33.7-55.7  | 0.46 | 0.26-0.84 | 2.30 | 0.88-4.46 |
| 4                           | 0.05-0.8  | 0.01-0.6 | 0.61 | 38.6  | 33.3-45.3  | 0.51 | 0.29-0.91 | 2.18 | 0.80-4.38 |
| <b>Sharks (10-800m)</b>     |           |          |      |       |            |      |           |      |           |
| Best model                  | 0.015-0.8 | 0.01-0.6 | 0.64 | 68.9  | 60.4-81.8  | 1.56 | 0.87-2.85 | 0.40 | 0.04-0.95 |
| 1                           | 0.015-0.5 | 0.01-0.4 | 0.56 | 75.5  | 60.2-101.7 | 1.44 | 0.80-2.59 | 0.54 | 0.04-1.36 |
| 2                           | 0.015-0.5 | 0.2-0.6  | 0.52 | 64.2  | 57.2-73.5  | 1.68 | 0.94-3.14 | 0.37 | 0.03-0.96 |
| 3                           | 0.015-0.8 | 0.2-0.6  | 0.58 | 66.1  | 58.9-75.2  | 1.61 | 0.89-2.93 | 0.38 | 0.04-0.89 |
| 4                           | 0.015-0.8 | 0.01-0.4 | 0.63 | 77.6  | 62.7-102.2 | 1.38 | 0.77-2.45 | 0.58 | 0.07-1.39 |
| <b><i>S. blainville</i></b> |           |          |      |       |            |      |           |      |           |
| Best model                  | 0.015-0.5 | 0.2-0.6  | 0.43 | 50.70 | 43.1-61.0  | 1.35 | 0.77-2.48 | 0.68 | 0.08-1.53 |
| 1                           | 0.015-0.1 | 0.01-0.4 | 0.14 | 106.1 | 84.7-139.5 | 0.66 | 0.38-1.32 | 1.44 | 0.21-3.96 |
| 2                           | 0.015-0.1 | 0.2-0.6  | 0.25 | 62.4  | 42.0-77.4  | 1.16 | 0.70-1.56 | 1.05 | 0.06-2.39 |
| 3                           | 0.015-0.5 | 0.01-0.4 | 0.47 | 64.8  | 47.2-92.1  | 1.05 | 0.58-1.88 | 1.04 | 0.16-2.37 |
| 4                           | 0.015-0.5 | 0.01-0.6 | 0.49 | 59.9  | 45.7-88.9  | 1.14 | 0.62-2.09 | 0.92 | 0.14-2.1  |
| <b><i>S. canicula</i></b>   |           |          |      |       |            |      |           |      |           |
| Best model                  | 0.05-0.8  | 0.2-0.6  | 0.51 | 29.7  | 21.7-44.6  | 1.26 | 0.69-2.27 | 0.73 | 0.09-1.71 |
| 1                           | 0.05-0.5  | 0.01-0.4 | 0.34 | 36.4  | 26.7-50.6  | 1.04 | 0.56-1.87 | 1.05 | 0.10-2.51 |
| 2                           | 0.05-0.5  | 0.2-0.6  | 0.40 | 29.2  | 21.6-42.2  | 1.29 | 0.72-2.32 | 0.76 | 0.07-1.84 |
| 3                           | 0.05-0.8  | 0.01-0.4 | 0.44 | 36.9  | 26.0-51.6  | 1.00 | 0.56-1.79 | 1.00 | 0.15-2.2  |
| 4                           | 0.05-0.8  | 0.01-0.6 | 0.48 | 32.0  | 22.2-48.2  | 1.16 | 0.65-2.1  | 0.83 | 0.11-1.91 |

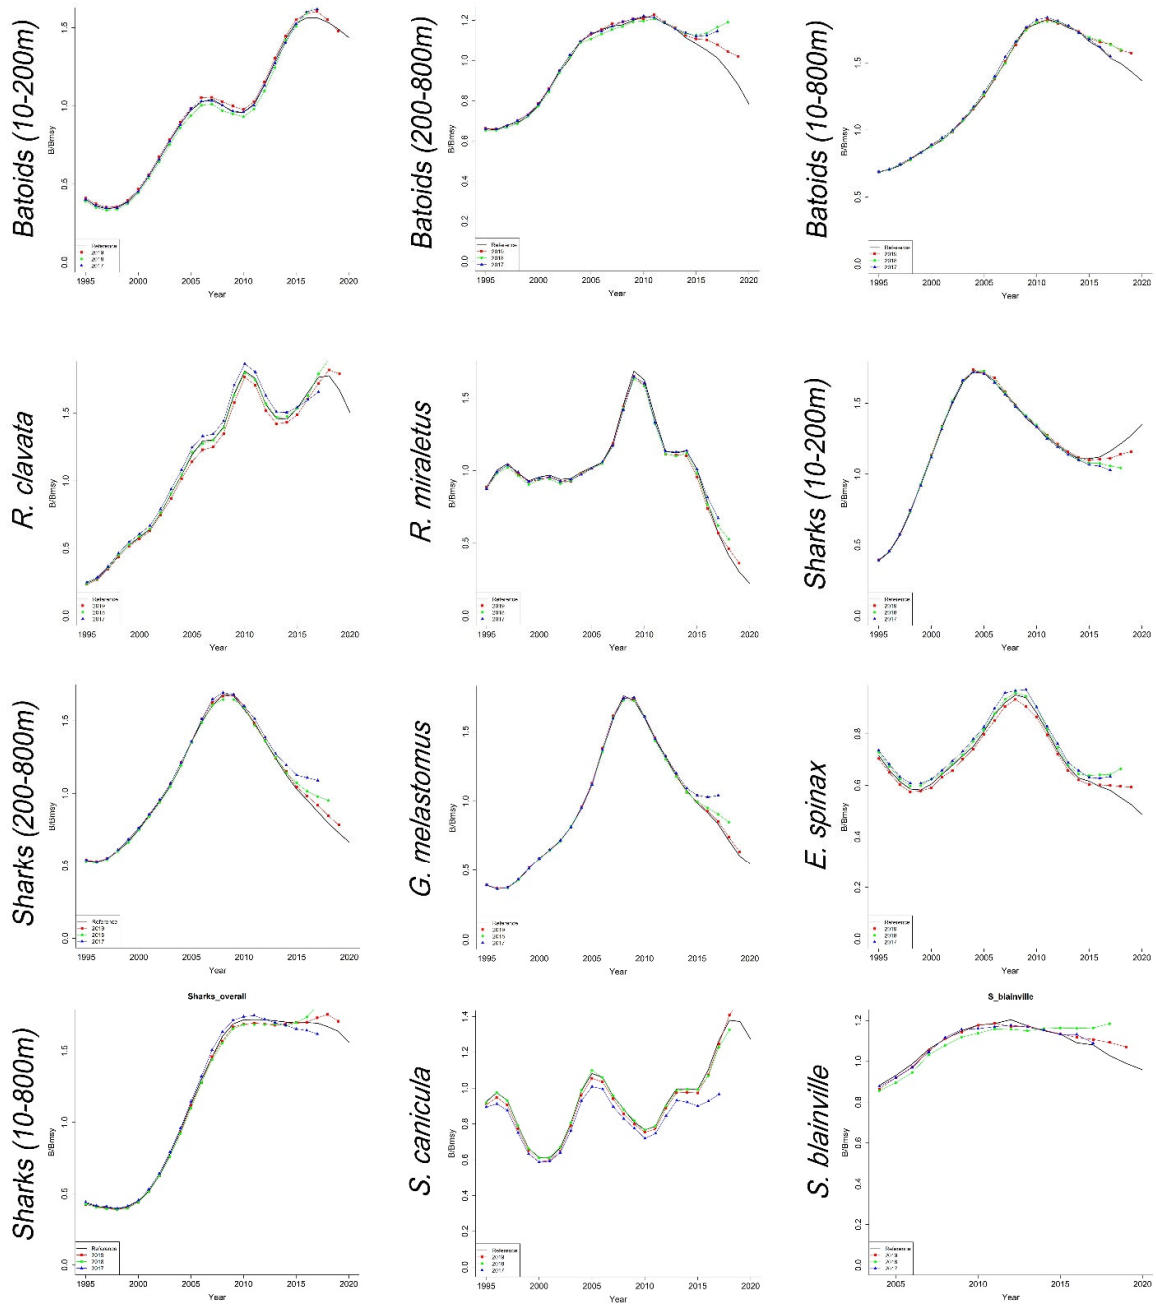

**Figure S1.** Retrospective analysis of investigated Elasmobranchii sampled during the MEDITS survey in GSA 16.
